# Supplementary material for: Uptake of Tele-Rehabilitation in Finland amongst Rehabilitation Professionals during the COVID-19 Pandemic
Source: MDPI journal article supplement (doi:10.3390/ijerph18084383), 2021-04-20
Supplement: s1 [file s1]

**Table S1.** Well-working and challenging sub-themes of tele-rehabilitation, by professional group.

| Implementing tele-rehabilitation                                      |    |    |     |     |                                                                                                       |    |    |     |     |
|-----------------------------------------------------------------------|----|----|-----|-----|-------------------------------------------------------------------------------------------------------|----|----|-----|-----|
| Well-working                                                          | PT | OT | SLT | PsT | Challenging                                                                                           | PT | OT | SLT | PsT |
| Negotiations, discussions and strengthened collaboration with clients | x  | x  | x   | x   | Assessment and observation of client's activity                                                       | x  | x  | x   |     |
| Use of familiar methods and materials                                 | x  | x  | x   | x   | Physical exercises and activities, manual and concrete guidance of clients and their close associates | x  | x  | x   | x   |
| Use of guidance                                                       | x  | x  | x   | x   | Work with emotions                                                                                    |    | x  |     | x   |
| Clients' progress in therapy                                          | x  | x  | x   | x   | Use and distribution of materials                                                                     |    |    | x   | x   |
| New kinds of models, methods, techniques and perspectives             | x  | x  | x   |     | Negotiations and co-operation with home, daycare and school                                           |    | x  | x   |     |
|                                                                       |    |    |     |     | Limited methods and techniques, focus on tasks and exercises                                          | x  | x  | x   |     |
|                                                                       |    |    |     |     | Activity modification and spontaneity in selection of exercises during therapy sessions               |    | x  | x   |     |
|                                                                       |    |    |     |     | Animal assisted therapy                                                                               |    | x  |     |     |
|                                                                       |    |    |     |     | Auditive and visual accuracy during observations                                                      | x  |    | x   |     |
|                                                                       |    |    |     |     | Tactile feeding rehabilitation                                                                        |    |    | x   |     |
|                                                                       |    |    |     |     | Adherence to goals                                                                                    |    |    | x   |     |
|                                                                       |    |    |     |     | Initiating tele-rehabilitation                                                                        |    |    |     |     |
| Well-working                                                          | PT | OT | SLT | PsT | Challenging                                                                                           | PT | OT | SLT | PsT |
| Clients' commitment, positive attitude and motivation towards TR      | x  | x  | x   | x   | Learning new ways to work                                                                             | x  | x  | x   | x   |
| Shared challenges in the uptake of TR                                 |    |    | x   | x   | Prejudices and attitudes of both professionals and clients                                            | x  | x  | x   | x   |
| Successful rapid implementation                                       |    | x  |     |     | Rapid, unpredicted implementation                                                                     |    | x  | x   | x   |
| Starting with collectively agreed schedules and procedures            |    | x  |     | x   | Additional procurements                                                                               | x  | x  | x   |     |
| Available education and training                                      |    | x  | x   |     | Lack of skills and knowledge                                                                          | x  | x  |     |     |
| Therapists' positive attitude                                         |    |    |     | x   | Motivating clients to try TR                                                                          | x  |    | x   |     |
|                                                                       |    |    |     |     | Licensure, legal liability and confusing administrative instructions                                  |    |    | x   |     |
| Support during tele-rehabilitation                                    |    |    |     |     |                                                                                                       |    |    |     |     |
| Well-working                                                          | PT | OT | SLT | PsT | Challenging                                                                                           | PT | OT | SLT | PsT |

|                                                                             |           |           |            |            |                                                                                                         |           |           |            |            |
|-----------------------------------------------------------------------------|-----------|-----------|------------|------------|---------------------------------------------------------------------------------------------------------|-----------|-----------|------------|------------|
| Support provided for the professionals                                      | x         | x         | x          |            | Lack of support for clients                                                                             | x         | x         |            |            |
| Skilled personal assistance for the client                                  | x         | x         | x          |            | Lack of skilled personal assistance for the client                                                      | x         | x         | x          |            |
| Parents' decent technical skills                                            |           |           | x          |            | Lack of interpretation services                                                                         |           | x         | x          |            |
|                                                                             |           |           |            |            | Clients' lack of financial resources for necessary equipment                                            |           |           | x          |            |
|                                                                             |           |           |            |            | Therapist's role as a technical support for clients                                                     |           | x         | x          | x          |
|                                                                             |           |           |            |            | Lack of technical and administrative support for professionals                                          | x         | x         |            | x          |
| <b>Tele-rehabilitation technology</b>                                       |           |           |            |            |                                                                                                         |           |           |            |            |
| <b>Well-working</b>                                                         | <b>PT</b> | <b>OT</b> | <b>SLT</b> | <b>PsT</b> | <b>Challenging</b>                                                                                      | <b>PT</b> | <b>OT</b> | <b>SLT</b> | <b>PsT</b> |
| Functioning technology and bandwidth                                        | x         | x         | x          | x          | Unreliable bandwidth and technology                                                                     | x         | x         | x          | x          |
| Appropriate, suitable and easy to use applications and equipment            | x         | x         | x          | x          | Information security                                                                                    |           | x         |            | x          |
|                                                                             |           |           |            |            | Lack of appropriate devices                                                                             | x         | x         | x          |            |
|                                                                             |           |           |            |            | Poor video and audio quality.                                                                           | x         | x         | x          |            |
|                                                                             |           |           |            |            | Poor device positioning and lighting conditions                                                         | x         |           | x          |            |
| <b>The context of tele-rehabilitation practice</b>                          |           |           |            |            |                                                                                                         |           |           |            |            |
| <b>Well-working</b>                                                         | <b>PT</b> | <b>OT</b> | <b>SLT</b> | <b>PsT</b> | <b>Challenging</b>                                                                                      | <b>PT</b> | <b>OT</b> | <b>SLT</b> | <b>PsT</b> |
| Flexibility in planning and carrying out TR                                 | x         | x         | x          | x          | Burden caused by flexible schedules, extended working days and new/additional duties at work            | x         | x         |            | x          |
| Efficient use of resources                                                  | x         | x         | x          |            | Planning and preparing sessions and the production of materials is time consuming                       | x         | x         | x          |            |
| Supports regularity in therapy (Less client delays and cancellations)       | x         |           |            | x          | Financial compensation is not in balance with the workload                                              |           |           | x          |            |
| Increase in possibilities to implement therapy                              |           |           | x          | x          | Work and home affairs get mixed                                                                         |           |           |            | x          |
|                                                                             |           |           |            |            | The use of certain assessment methods or standardized tests or diagnostic tools is not applicable in TR |           |           | x          |            |
| <b>Tele-rehabilitation related to the professionals' well-being at work</b> |           |           |            |            |                                                                                                         |           |           |            |            |
| <b>Well-working</b>                                                         | <b>PT</b> | <b>OT</b> | <b>SLT</b> | <b>PsT</b> | <b>Challenging</b>                                                                                      | <b>PT</b> | <b>OT</b> | <b>SLT</b> | <b>PsT</b> |
| Development in ways guiding clients                                         |           |           | x          |            | TR burdens and exhausts more than face to face rehabilitation                                           | x         | x         | x          | x          |

|                                                                                                    |           |           |            |            |                                                                                 |           |           |            |            |
|----------------------------------------------------------------------------------------------------|-----------|-----------|------------|------------|---------------------------------------------------------------------------------|-----------|-----------|------------|------------|
| Getting new knowledge, learning new things and ideas is refreshing                                 |           |           |            | x          | Experience of loneliness at work                                                |           | x         |            | x          |
| Decreased emotional strain                                                                         |           |           |            | x          | Concern about clients                                                           |           | x         |            |            |
|                                                                                                    |           |           |            |            | Additional challenges at work                                                   |           | x         |            |            |
| <b>Interaction during tele-rehabilitation</b>                                                      |           |           |            |            |                                                                                 |           |           |            |            |
| <b>Well-working</b>                                                                                | <b>PT</b> | <b>OT</b> | <b>SLT</b> | <b>PsT</b> | <b>Challenging</b>                                                              | <b>PT</b> | <b>OT</b> | <b>SLT</b> | <b>PsT</b> |
| Fluent and intensive interaction                                                                   | x         | x         | x          | x          | Differences in interaction and its intensity compared to face to face situation | x         | x         | x          | x          |
| Clients' active engagement and improved focusing                                                   | x         | x         | x          | x          | Misunderstandings in communication                                              | x         | x         | x          |            |
| Progress in interaction                                                                            | x         | x         | x          |            | Difficulties to guide interaction between client and close associate            | x         | x         | x          |            |
| Encouraged clients                                                                                 |           | x         | x          | x          | Time-consuming to learn to interact within an unfamiliar setting.               |           | x         | x          |            |
| Clients have better possibilities to control interaction.                                          |           |           |            | x          | Understanding nonverbal and visual cues                                         |           | x         | x          | x          |
| Possibility to focus on essential issues in therapy sessions                                       |           |           |            | x          | No shared physical environment                                                  | x         | x         | x          | x          |
|                                                                                                    |           |           |            |            | Therapists' help, therapeutic alliance and confidentiality                      | x         | x         | x          | x          |
|                                                                                                    |           |           |            |            | Work with emotions                                                              |           |           |            | x          |
|                                                                                                    |           |           |            |            | Clients' preference for personal presence                                       |           |           |            | x          |
|                                                                                                    |           |           |            |            | Client too timid or passive to participate                                      |           |           | x          |            |
|                                                                                                    |           |           |            |            | Lack of physical contact                                                        | x         | x         | x          |            |
| <b>Tele-rehabilitation in everyday life environment</b>                                            |           |           |            |            |                                                                                 |           |           |            |            |
| <b>Well-working</b>                                                                                | <b>PT</b> | <b>OT</b> | <b>SLT</b> | <b>PsT</b> | <b>Challenging</b>                                                              | <b>PT</b> | <b>OT</b> | <b>SLT</b> | <b>PsT</b> |
| Therapists learn more about clients' everyday life environment and are able to apply methods in it | x         | x         | x          | x          | Lack of a peaceful space                                                        | x         | x         | x          | x          |
| Easy for clients to participate in the therapy sessions                                            | x         | x         | x          | x          | Lack of capacity or resources in families to participate in TR                  | x         | x         | x          |            |
| Safe environment for the clients                                                                   | x         | x         |            | x          | Parental burden                                                                 | x         | x         | x          |            |
| Participation of close associates                                                                  | x         | x         | x          |            | Lack of privacy and security                                                    |           | x         |            | x          |
| Clients take more responsibility for their own rehabilitation                                      | x         | x         |            |            | Too little space and lack of safe environment for practical exercises at home   | x         | x         |            |            |
|                                                                                                    |           |           |            |            | Lack of equipment or challenges in their use                                    | x         | x         |            |            |
|                                                                                                    |           |           |            |            | Distribution of work amongst people present in therapy sessions                 | x         |           | x          |            |

|  |                                                                                    |   |   |   |
|--|------------------------------------------------------------------------------------|---|---|---|
|  | Participation of close associates changes interaction                              | x | x | x |
|  | Parents' attitudes                                                                 | x |   | x |
|  | Transfers to therapists' reception that support orientation to therapy are missing |   |   | x |

PT= Physiotherapists, OT= Occupational therapists, SLT= Speech and language therapists, PsT= Psychotherapists
